# Supplementary material for: Electrocatalysis of Methanol Oxidation in Alkaline Electrolytes over Novel Amorphous Fe/Ni Biphosphate Material Prepared by Different Techniques
Source: MDPI journal article supplement (doi:10.3390/nano12193429), 2022-09-30
Supplement: s1 [file s1]

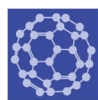

Supplementary Materials

# Electrocatalysis of Methanol Oxidation in Alkaline Electrolytes over Novel Amorphous Fe/Ni Biphosphate Material Prepared by Different Techniques

Mai M. Khalaf<sup>1,2</sup>, Hany M. Abd El-Lateef<sup>1,2,\*</sup>, Van-Duong Dao<sup>3,\*</sup> and Ibrahim M. A. Mohamed<sup>2</sup>

<sup>1</sup> Department of Chemistry, College of Science, King Faisal University, Al-Ahsa 31982, Saudi Arabia

<sup>2</sup> Department of Chemistry, Faculty of Science, Sohag University, Sohag 82524, Egypt

<sup>3</sup> Faculty of Biotechnology, Chemistry and Environmental Engineering, Phenikaa University, Hanoi 10000, Vietnam

\* Correspondence: hmahmed@kfu.edu.sa or hany\_shubra@science.sohag.edu.eg (H.M.A.E.-L.); duong.daovan@phenikaa-uni.edu.vn (V.-D.D.)

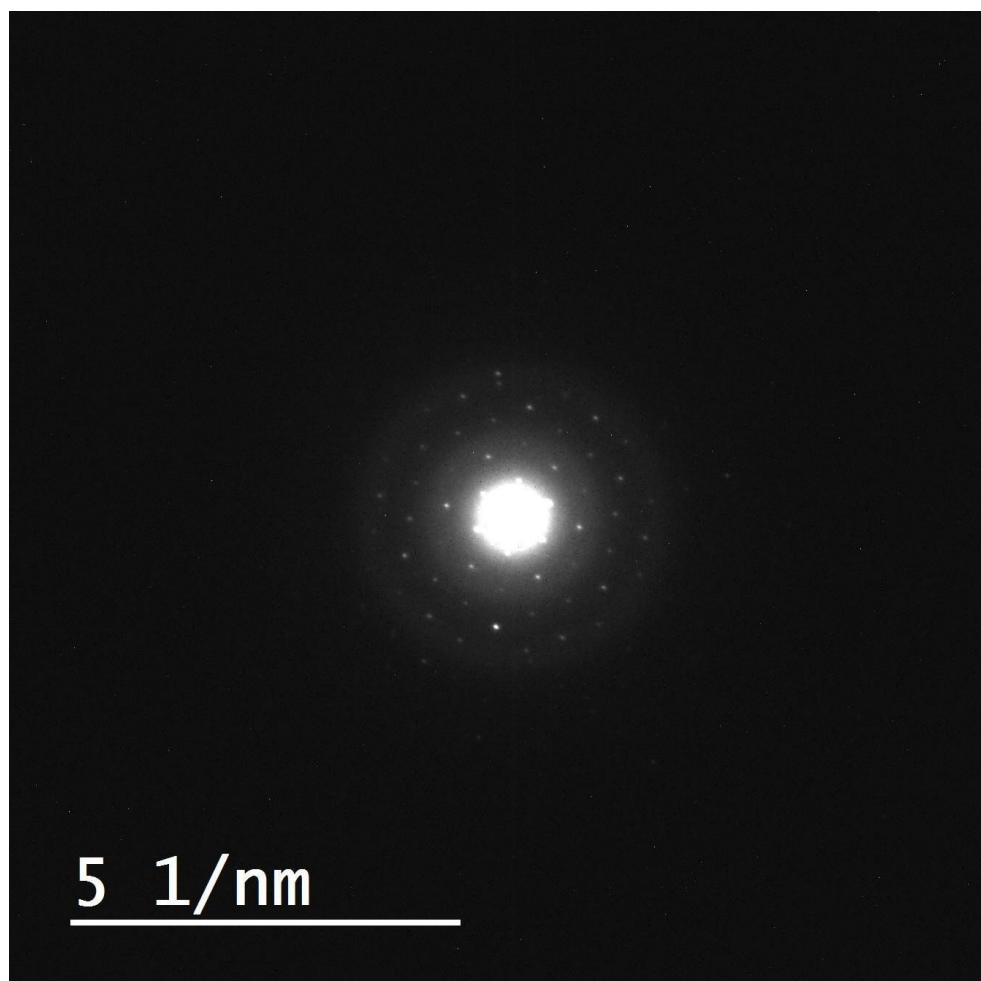

**Figure S1.** SAED of the synthesized FeNiP-R material.

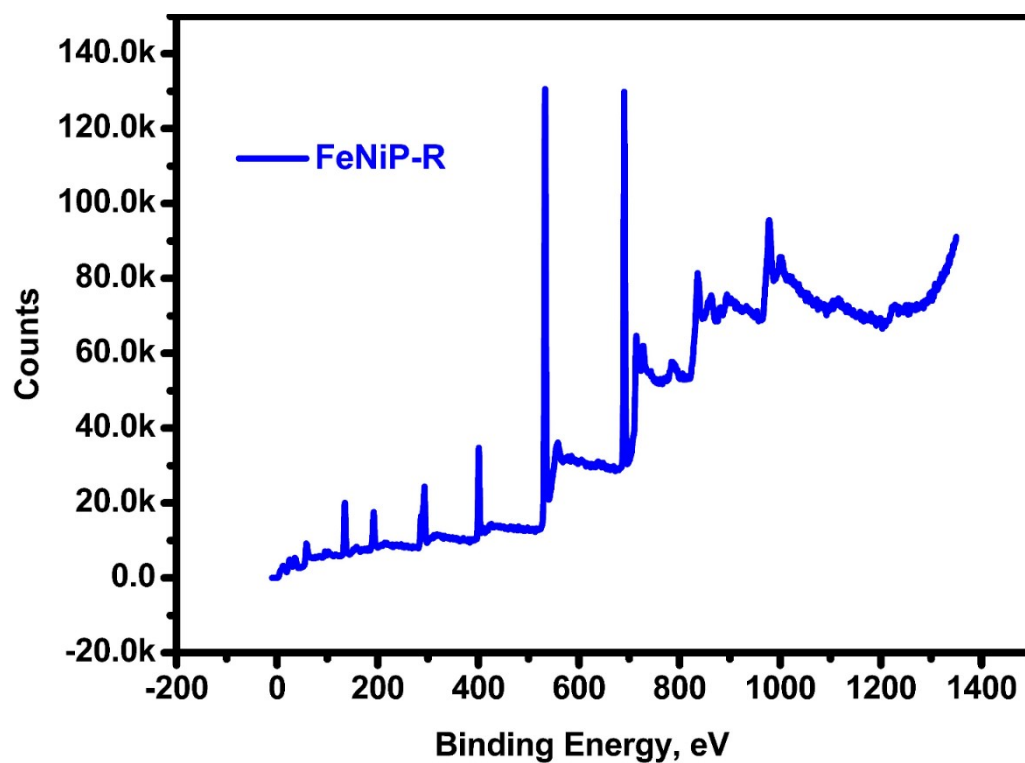

Figure S2. Total survey XPS of the prepared FeNiP-R material in the range of 0–1400 eV.

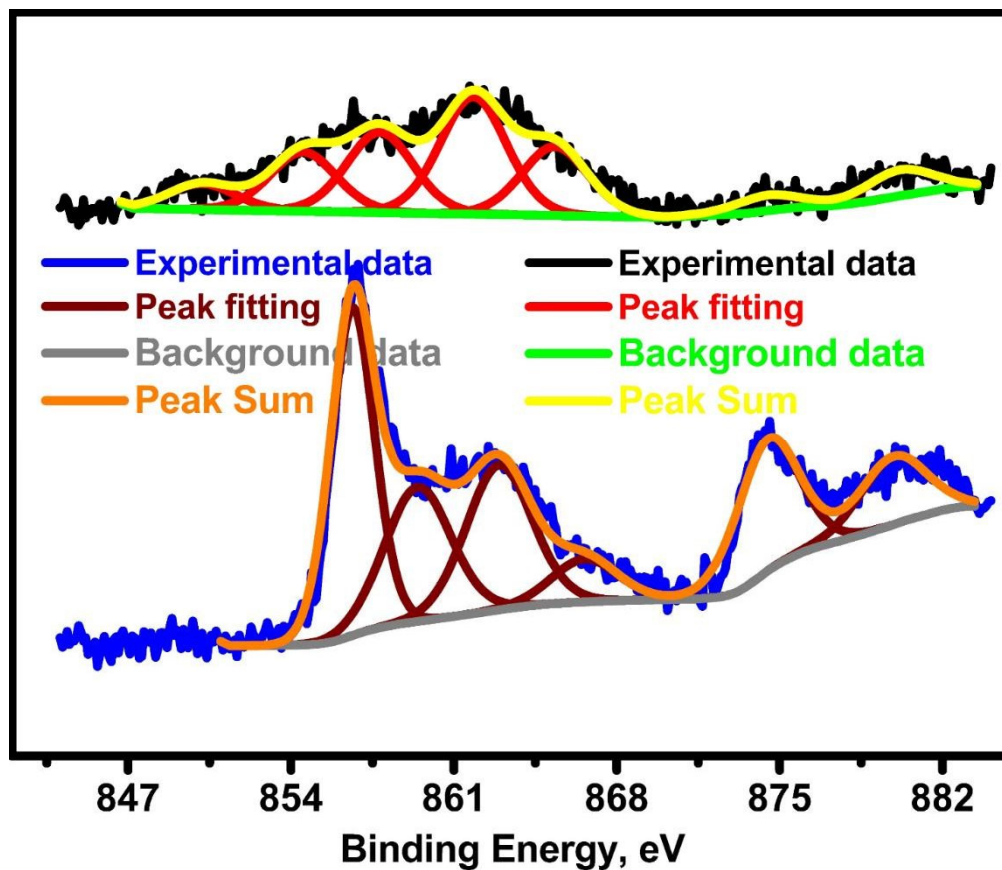

Figure S3. XPS fine spectra of the fabricated FeNiP-R and FeNiP-S materials in the nickel region.

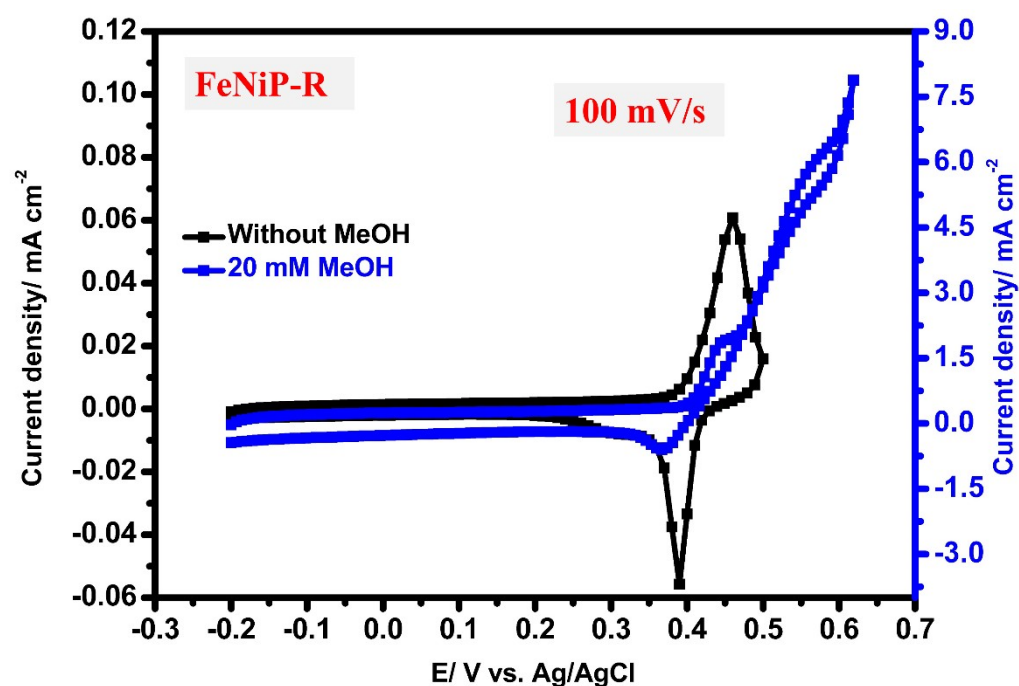

Figure S4. Cyclic voltammograms of the FeNiP-R working electrode in KOH medium with and without 20 mM methanol at 100 mV/s.

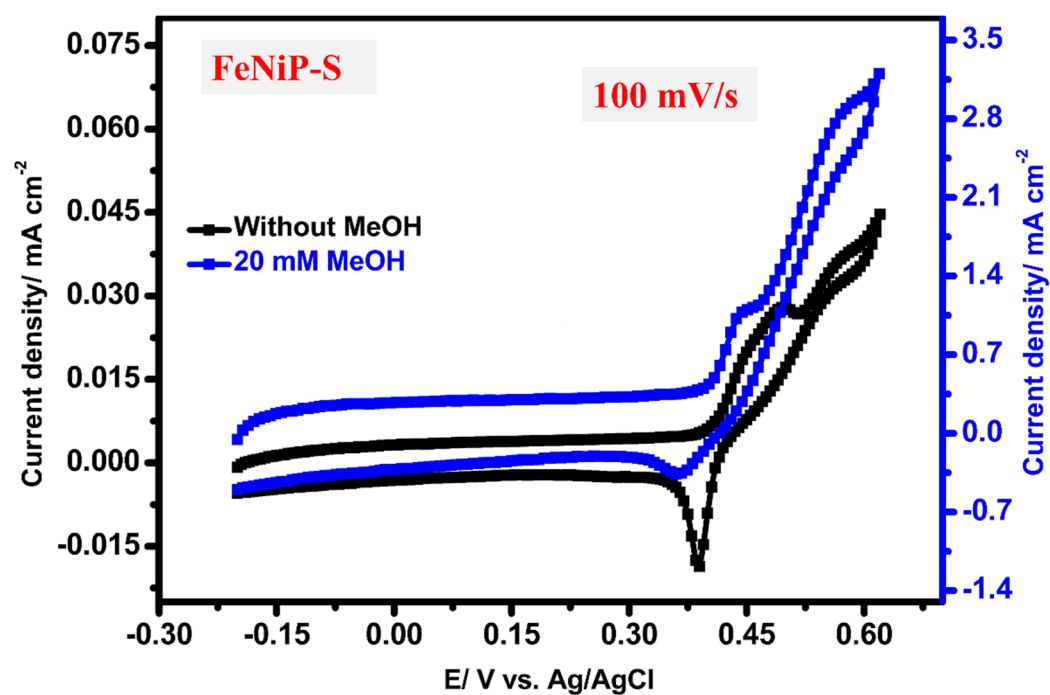

Figure S5. Cyclic voltammograms of the FeNiP-S working electrode in KOH medium with and without 20 mM methanol at 100 mV/s.

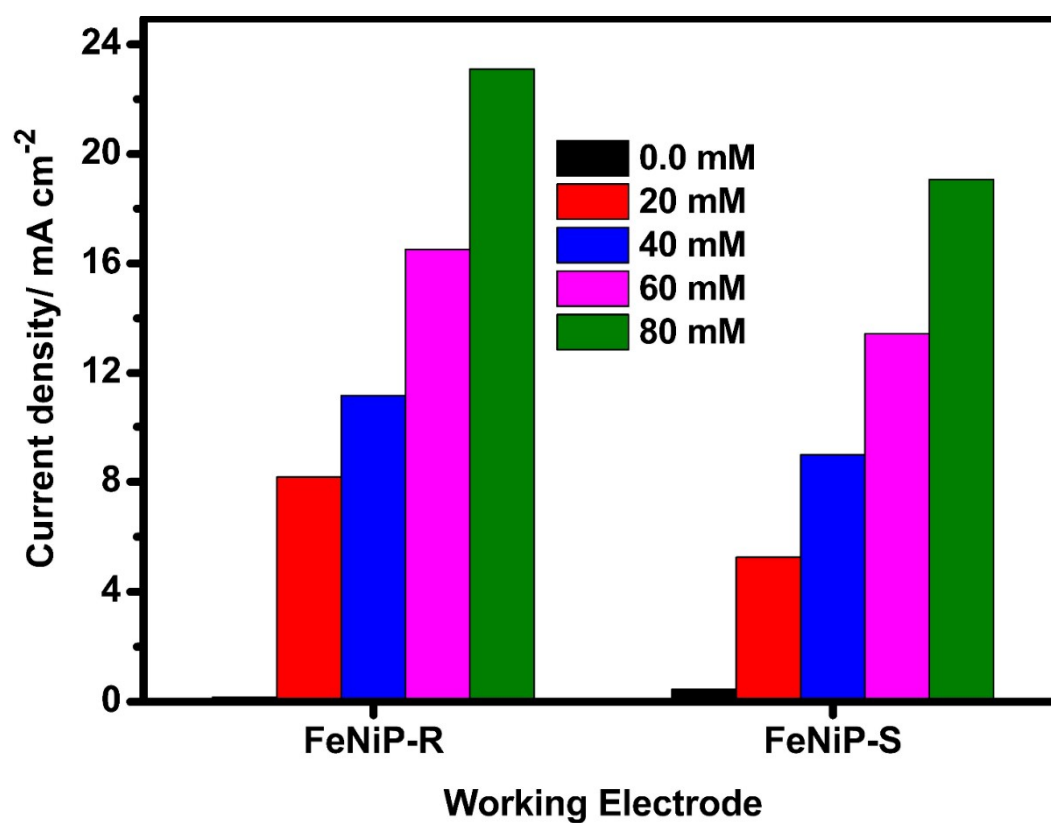

**Figure S6.** The obtained current values of FeNiP-R and FeNiP-S working electrodes after 1016 s.
